# Supplementary material for: Porous cobalt phosphide/graphitic carbon polyhedral hybrid composites for efficient oxygen evolution reactions
Source: Royal Society of Chemistry journal article supplement (doi:10.1039/c6ta05679b), 2016-01-01
Supplement: c6ta05679b1.pdf [file c6ta05679b1.pdf]

## **Porous Cobalt Phosphide/Graphitic Carbon Polyhedra Hybrid Composites for Efficient Oxygen Evolution Reactions**

Renbing Wu,<sup>a,b</sup> Dan Ping Wang,<sup>c,d</sup> Kun Zhou,<sup>b\*</sup> Narasimalu Srikanth,<sup>e</sup> Jun Wei,<sup>e</sup> Zhong  
Chen<sup>d\*</sup>

<sup>a</sup> *Department of Materials Science, Fudan University, Shanghai 200433, China*

<sup>b</sup> *School of Mechanical and Aerospace Engineering, Nanyang Technological University,  
Singapore 639798, Singapore*

<sup>c</sup> *Energy Research Institute, Nanyang Technological University, Singapore 6371412,  
Singapore*

<sup>d</sup> *School of Materials Science and Engineering, Nanyang Technological University,  
Singapore 639798, Singapore*

<sup>e</sup> *Singapore Institute of Manufacturing, Singapore 638075, Singapore*

**Experimental Section**

*Preparation of ZIFs template.* All chemicals and solvents were purchased from commercial sources and used without any further purification. In a typical preparation, 5 mmol  $\text{Co}(\text{NO}_3)_2 \cdot 6\text{H}_2\text{O}$  were dissolved in 40 ml methanol to form a clear solution, which was then poured into 40 ml of methanol containing 20 mmol 2-methylimidazole. After thorough mixing and incubation at room temperature for 24 h, the resulting pink precipitates were collected by centrifugation, washed with ethanol several times and finally dried in air at  $60^\circ\text{C}$ .

*Synthesis of CoP@GC hybrid composites and CoP particles.* In a typical procedure, 200 mg ZIF-67 and 100 mg red phosphorus were placed at two separate positions in a combustion boat and then heated then heated to  $700^\circ\text{C}$  at a rate of  $2^\circ\text{C min}^{-1}$  and maintained at this temperature for 2 h under an argon gas flow of  $60\text{ mL min}^{-1}$ . CoP particles were prepared through phosphorization of commercial  $\text{Co}_3\text{O}_4$  particles according to previously reported method [S1].

*Characterization.* X-ray diffraction (XRD) patterns were collected on a Bruker D8-Advance using  $\text{Cu K}_\alpha$  radiation ( $\lambda=1.5406\text{ \AA}$ ). Field-emission scanning electron microscopy (FESEM) images were recorded on a JSOL JSM-7600F scanning electron microscope. Transmission electron microscopy (TEM), high-resolution TEM (HRTEM), high-angle dark-field scanning TEM (HAADF-STEM) and energy-dispersive X-ray spectroscopy (EDS) elemental mapping images were all recorded on a JEOL JEM-2100F transmission electron microscope. The X-ray photoelectron spectroscopy (XPS) analyses were performed using a PHI 5600 XPS instrument. The Brunauer-Emmett-Teller (BET) specific surface areas of products were

calculated from the results of N<sub>2</sub> physisorption at 77 K using a Quantachrome Instruments Autosorb AS-6B instrument.

*Electrocatalytic measurements.* All electrochemical measurements were performed in a three-electrode glass cell system including platinum foil and Ag/AgCl (saturated KCl) electrodes as the counter and the reference electrodes, respectively, and a glassy carbon electrode (GCE, 5 mm in diameter) coated with as-prepared samples as the working electrode. To prepare the working electrode, 5 mg of the sample was dispersed in 1 ml water/ethanol mixed solvent (v/v=1:1) solution with 40  $\mu$ L of 5 wt% Nafion and then sonicated for 30 min to form a homogenous catalyst inks. After that, 10  $\mu$ L of the catalyst ink was dropped onto the surface of the pre-polished GCE. For comparison, a bare GCE that had been polished and cleaned was also evaluated for electrochemical measurements. Before the measurement, the electrolyte (1 M KOH solution) was purged by O<sub>2</sub> for at least 30 min to ensure the saturation of the electrolyte. Linear sweep voltammetry (LSV) curves were measured at a sweep rate of 2 mV s<sup>-1</sup> to obtain the polarization curves. The accelerated durability tests were conducted by potential cycling for 1000 cycles and at 347 mV in 1 M KOH solution for 10 h. All potentials reported here were referenced to the reversible hydrogen electrode (RHE) through RHE calibration. Electrical impedance spectroscopy (EIS) was carried out from 10<sup>6</sup> to 0.1 Hz with an AC amplitude 5 mV.

S2

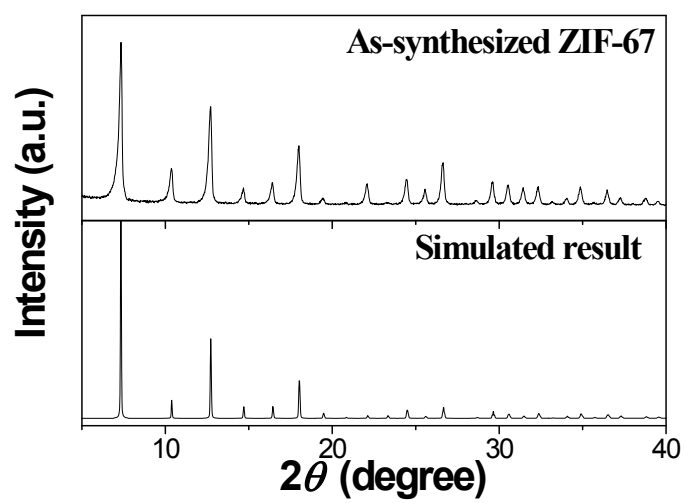

**Figure S1.** Experimental and simulated XRD patterns of ZIF-67.

### S3

**Table S1** Comparison of the OER activities of the CoP catalysts in alkaline conditions with recently reported Co-based Catalyst.

| Electrocatalyst                                                 | Overpotential at 10 mA cm <sup>-2</sup> | Electrolyte | References |
|-----------------------------------------------------------------|-----------------------------------------|-------------|------------|
| CoP hollow polyhedron                                           | 400 mV                                  | 1 M KOH     | S1         |
| (Co <sub>x</sub> Fe <sub>1-x</sub> ) <sub>2</sub> P nanourchins | 370 mV                                  | 0.1 M KOH   | S2         |
| CoCr <sub>2</sub> O <sub>4</sub> /carbon nanosheets             | 365 mV                                  | 1 M KOH     | S3         |
| Ni-modified CoP-based nanoparticles                             | 360 mV                                  | 1 M KOH     | S4         |
| CoO <sub>x</sub> -C                                             | 360 mV                                  | 0.1 M KOH   | S5         |
| Mesoporous cobalt phosphate                                     | 380 mV                                  | 1 M KOH     | S6         |
| Zn <sub>2</sub> Co <sub>2</sub> O <sub>4</sub>                  | 390 mV                                  | 1 M KOH     | S7         |
| NiCo <sub>2</sub> O <sub>4</sub> Nanoneedles                    | 565 mV                                  | 1 M KOH     | S8         |
| CoP/graphene oxide                                              | 340 mV                                  | 1 M KOH     | S9         |
| NiCo double hydroxide nanosheets                                | 367 mV                                  | 1 M KOH     | S10        |
| CoP@GC (This work)                                              | 345 mV                                  | 1 M KOH     | This work  |

All potentials were converted to the reversible hydrogen electrode (RHE) scale, unless otherwise stated.

### References

- S1. M. J. Liu, J. H. Li, *ACS Appl. Mater. Interfaces*, 2016, **8**, 2158–2165.
- S2. A. Mendoza-Garcia, D. Su, S. H. Sun, *Nanoscale*, 2016, **8**, 3244–3247.
- S3. M. Al-Mamun, X. T. Su, H. M. Zhang, H. J. Yin, P. Liu, H. G. Yang, D. Wang, Z. Y. Tang, Y. Wang, H. J. Zhao, *Small*, 2016, **12**, 2866–2871.
- S4. J. A. Vigil, T. N. Lambert and B. T. Christensen, *J. Mater. Chem. A*, 2016, **4**, 7549–7554.
- S5. M. Zhang, Y. L. Huang, J. W. Wang and T. B. Lu, *J. Mater. Chem. A*, 2016, **4**, 1819–1827.
- S6. M. Pramanik, C. L. Li, M. Imura, V. Malgras, Y. M. Kang, Y. Yamauchi, *Small*, 2016, **12**,

1709–1715.

S7. T. W. Kim, M. A. Woo, M. Regis, K. S. Choi, *J. Phys. Chem. Lett.*, 2014, **5**, 2370–2374.

S8. H. J. Shi, G. H. Zhao, *J. Phys. Chem. C* 2014, **118**, 25939–25946.

S9. L. Jiao, Y. Z. Zhou, H. L. Jiang, *Chem. Sci.*, 2016, **7**, 1690–1695.

S10. H. F. Liang, F. Meng, M. Caban-Acevedo, L. S. Li, A. Forticaux, L. C. Xiu, Z. C. Wang, S. Jin, *Nano lett.*, 2015, **15**, 1421–1427.
